# Supplementary material
Source: PubMed Central journal article supplement (PMC11107335)
Supplement: NIHMS1973784-supplement-Suplemental_table.pdf [file NIHMS1973784-supplement-Suplemental_table.pdf]

ONLINE ONLY

## Supplemental material

### Radiographic and clinical outcomes using intraoperative magnetic resonance imaging for transsphenoidal resection of pituitary adenomas

Juthani et al.

<https://thejns.org/doi/abs/10.3171/2020.4.JNS20178>

**DISCLAIMER** The *Journal of Neurosurgery* acknowledges that the following section is published verbatim as submitted by the authors and did not go through either the *Journal's* peer-review or editing process.

| <b>Author/Year</b>          | <b>Approach</b>                                                    | <b>Secretary/NFA</b>                           | <b>Total cases</b>                      | <b>Hormone improvement</b>                               | <b>New hormone deficit</b>                                             |
|-----------------------------|--------------------------------------------------------------------|------------------------------------------------|-----------------------------------------|----------------------------------------------------------|------------------------------------------------------------------------|
| Little,2019 <sup>6</sup>    | Microscopic                                                        | NFA                                            | 82                                      | 24%                                                      | 28.4% (6mo)                                                            |
|                             | Endoscopic                                                         | NFA                                            | 177                                     | 21.5%                                                    | 9.7% (6mo)                                                             |
| Harary, 2018 <sup>2</sup>   | Endoscopic                                                         | NFA                                            | 160                                     | 55%                                                      | 23.1%<br>(10.6%<br>excluding<br>transient DI)                          |
| Kim, 2018 <sup>4</sup>      | Endoscopic                                                         | NFA                                            | 331                                     | 15.4%                                                    | 32.9% (26%<br>excluding<br>transient DI)                               |
| Netuka,2016 <sup>7</sup>    | Endoscopic                                                         | GH(with<br>iMRI)                               | 105                                     | Not reported                                             | 12.5%                                                                  |
| Seltzer ,2018 <sup>8</sup>  | Microscopic<br>(50)<br>Endoscopic<br>(2)<br>(reported<br>together) | Incidental<br>adenomas –<br>NFA +<br>Secretary | 52<br>(endocrine<br>follow-up in<br>38) | 7.7%<br>(excluding<br>secretory<br>hormone<br>remission) | 13.2%*DI<br>not reported                                               |
| Chen,2017 <sup>1</sup>      | Microscope                                                         | GH                                             | 111                                     | Not reported                                             | 15.7%                                                                  |
|                             | Endoscope                                                          | GH                                             | 180                                     | Not reported                                             | 14.2%                                                                  |
| Jahangiri,2016 <sup>3</sup> | Endoscopic                                                         | NFA                                            | 305                                     | 53%                                                      | 13.7% *Did<br>not include<br>DI                                        |
| Laws,2016 <sup>5</sup>      |                                                                    | NFAs +<br>Secretary                            | 80                                      | 7.4%                                                     | 8.75%<br>(including<br>permanent<br>DI) 12.5 %<br>(including<br>SIADH) |

**Supplemental Table 1.** Endocrine outcomes in recently published data

1. Chen CJ, Ironside N, Pomeraniec IJ, Chivukula S, Buell TJ, Ding D, et al: Microsurgical versus endoscopic transsphenoidal resection for acromegaly: a systematic review of outcomes and complications. **Acta Neurochir (Wien)** **159**:2193-2207, 2017
2. Harary M, DiRisio AC, Dawood HY, Kim J, Lamba N, Cho CH, et al: Endocrine function and gland volume after endoscopic transsphenoidal surgery for nonfunctional pituitary macroadenomas. **J Neurosurg**:1-10, 2018
3. Jahangiri A, Wagner JR, Han SW, Tran MT, Miller LM, Chen R, et al: Improved versus worsened endocrine function after transsphenoidal surgery for nonfunctional pituitary adenomas: rate, time course, and radiological analysis. **J Neurosurg** **124**:589-595, 2016
4. Kim JH, Lee JH, Lee JH, Hong AR, Kim YJ, Kim YH: Endoscopic Transsphenoidal Surgery Outcomes in 331 Nonfunctioning Pituitary Adenoma Cases After a Single Surgeon Learning Curve. **World Neurosurg** **109**:e409-e416, 2018
5. Laws ER, Jr., Iuliano SL, Cote DJ, Woodmansee W, Hsu L, Cho CH: A Benchmark for Preservation of Normal Pituitary Function After Endoscopic Transsphenoidal Surgery for Pituitary Macroadenomas. **World Neurosurg** **91**:371-375, 2016
6. Little AS, Kelly DF, White WL, Gardner PA, Fernandez-Miranda JC, Chicoine MR, et al: Results of a prospective multicenter controlled study comparing surgical outcomes of microscopic versus fully endoscopic transsphenoidal surgery for nonfunctioning pituitary adenomas: the Transsphenoidal Extent of Resection (TRANSSPHER) Study. **J Neurosurg**:1-11, 2019
7. Netuka D, Majovsky M, Masopust V, Belsan T, Marek J, Krsek M, et al: Intraoperative Magnetic Resonance Imaging During Endoscopic Transsphenoidal Surgery of Growth Hormone-Secreting Pituitary Adenomas. **World Neurosurg** **91**:490-496, 2016
8. Seltzer J, Wedemeyer MA, Bonney PA, Carmichael JD, Weiss M, Zada G: Outcomes following transsphenoidal surgical management of incidental pituitary adenomas: a series of 52 patients over a 17-year period. **J Neurosurg**:1-9, 2018
